# Supplementary material for: Arabidopsis WRKY6 Transcription Factor Acts as a Positive Regulator of Abscisic Acid Signaling during Seed Germination and Early Seedling Development
Source: PubMed Central journal article supplement (PMC4734665; doi:10.1371/journal.pgen.1005833), 2016-02-01
Supplement: pgen.1005833.s001.pdf [file pgen.1005833.s001.pdf]

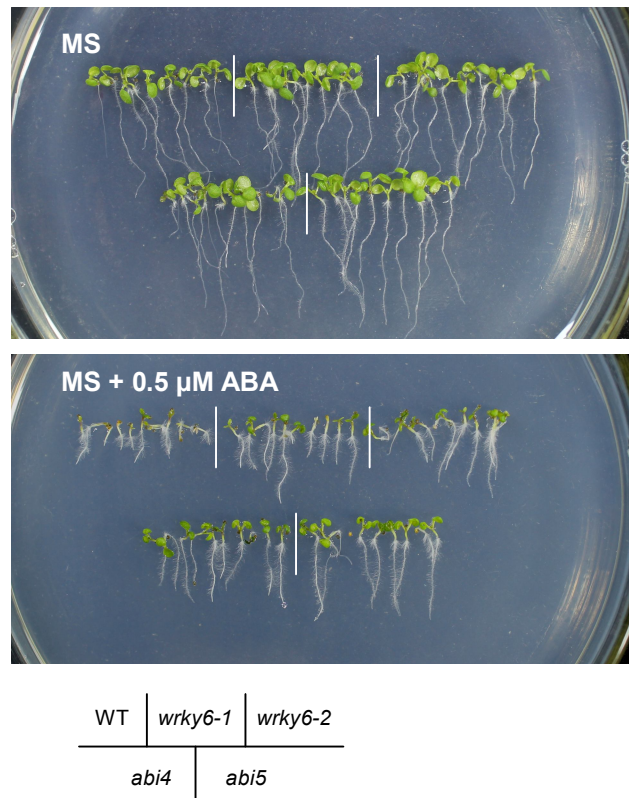

**Fig. S1. Phenotypic comparison.**  
Imbibed seeds were transferred to MS or MS + 0.5  $\mu$ M ABA medium and grown for 8 d.
