# Supplementary material for: Arabidopsis WRKY6 Transcription Factor Acts as a Positive Regulator of Abscisic Acid Signaling during Seed Germination and Early Seedling Development
Source: PubMed Central journal article supplement (PMC4734665; doi:10.1371/journal.pgen.1005833), 2016-02-01
Supplement: pgen.1005833.s002.pdf [file pgen.1005833.s002.pdf]

**Supplemental Table 1.** Primer sequences used in this study.

| Primer Name                                        | Forward Primer (5' → 3')               | Reverse Primer (5' → 3')       |
|----------------------------------------------------|----------------------------------------|--------------------------------|
| Primers for qRT-PCR                                |                                        |                                |
| <i>Actin2/8</i>                                    | ACGGTAACATTGTGCTCAGTGGTG               | CTTGGAGATCCACATCTGCTGGA        |
| <i>WRKY6</i>                                       | GAGGCCGAGGATGTGTCAA                    | GAGGCCGAGGATGTGTCAA            |
| <i>RAV1</i>                                        | GAGGCCGAGGATGTGTCAA                    | GAGGCCGAGGATGTGTCAA            |
| <i>ABI3</i>                                        | TCCATTAGACAGCAGTCAAGGTTT               | GGTGTCAAAGAAGCTCGTTGCTATC      |
| <i>ABI4</i>                                        | GGGCAGGAACAAGGAGGAAG TG                | ACGGCGGTGGATGAGTTATTGAT        |
| <i>ABI5</i>                                        | CAATAAGAGAGGGATAGCGAACGAG              | CAATAAGAGAGGGATAGCGAACGAG      |
| <i>Em1</i>                                         | TAGGGCACGAGGGTTATCAG                   | CGCTCTCCACCAGATTTTTTC          |
| <i>Em6</i>                                         | GCAAACCTCGAAAGGAGCAGT                  | TCTCGACTCCTTCCTCCTCA           |
| <i>ABF1</i>                                        | TCAACAACCTTAGGCGGCGATAC                | GCAACCGAAGATGTAGTAGT           |
| <i>ABF2</i>                                        | TTGGGGAATGAGCCACCAGGAG                 | GACCCAAAATCTTCCCTACAC          |
| <i>ABF3</i>                                        | CTTTGTTGATGGTGTGAGTGAG                 | GTGTTTCCACTATTACCATTGC         |
| <i>SnRK2.2</i>                                     | CCGGAGATCACATCCGATAA                   | ATGAAATCATCGAGGCAACG           |
| <i>SnRK2.3</i>                                     | CAAATTTGCCATCGTGACCT                   | GCAGTACCTCTGGAGCGATG           |
| <i>SnRK2.6</i>                                     | AGATCCCGAGGAACCAAAGA                   | CTCTTTGCAGGGTCAGCAAC           |
| Primers for ChIP and EMSA                          |                                        |                                |
| Actin                                              | CCGGTATTGTGCTCGATTCTG                  | TTCCCGTTCTGCGGTAGTGG           |
| RAV1 P1                                            | GCCCACAACATATTCATTTT                   | ATATTTGTAAGAATGCGTGTTT         |
| RAV1 P2                                            | GATAAGATCGTAAGCTATCCAC                 | GTTTCTCATAAGTGGGTG             |
| ABI3                                               | ATTTGGTTTGAAGAACATGCC                  | GGAAAATTCCTATTTTCCCG           |
| ABI4                                               | GGTGTAGTATCCAAAATCTAAATCTATCG          | CTGGAGTAGTACTTGTTAAATTTGGAG    |
| ABI5 -1                                            | TAGCCGAAGTCACACGTGT                    | AGGAGGCGGTAAAAGAGAGAT          |
| ABI5-2                                             | TCTCGACTTTGATTTGTTTTAA                 | ACATATTGGTTTCATGATTTG          |
| Primers for protein expression in <i>E. coli</i> . |                                        |                                |
| WRKY6-His                                          | GGCTTAAUGACAGAGGATGGTCTGGTCTCAC        | GGTTTAAUTTGAATTTTGTGTTTCCTTCGC |
| For Genotyping                                     |                                        |                                |
| wrky6-2 LP                                         | GAACGTATTAGCCAATCACGC                  |                                |
| wrky6-2 RP                                         | TGTGGACGTGTCATAATTTGG                  |                                |
| LBb1.3                                             | ATTTTGCCGATTTCCGGAAC                   |                                |
| For ProABIs:GUS construct                          |                                        |                                |
| ProABI3                                            | GAATTCACATAAAATTTTGTGTTAA              | CTGCAGATCGTTGAAGTGAAAT         |
| ProABI4                                            | GAATTCAGCGTACATAAATATCTACACTATAACTCCTC | GTGCACAGATGAAGAAGAAGAAGAAGAAGA |
| ProABI5                                            | GGATCCTCTACTTTCACCAGCTAGAA             | CTGCAGATTTAACAACTGCATCATATAC   |
